# Supplementary material
Source: publisher site journal article supplement (https://www.dovepress.com/article/342123)
Supplement: Supplementary file 1 [file get_supplementary_file.php]

# Supplemental Materials

**Supplemental Table 1: Patient demographic characteristics and prescriber specialty among patients with one year of follow‑up**

|  | | **Apremilast** | **Methotrexate** | **All** | ***P* Value** |
| --- | --- | --- | --- | --- | --- |
| N | | 534 | 1,582 | 2,116 |  |
| % | | 25.2 | 74.8 | 100 |  |
| **Age, years** | Mean | 50.5 | 50.4 | 50.4 | 0.938 |
| (SD) | (11.6) | (11.3) | (11.3) |  |
| [Median] | [52] | [52] | [52] |  |
| 5th : 95th percentile | 31: 68 | 30: 67 | 30: 67 |  |
|  |  |  |  |  | 0.923 |
| 18-30 | no. | 26 | 81 | 107 |  |
| (%) | (4.9) | (5.1) | (5.1) |  |
| 31-64 | no. | 471 | 1,385 | 1,856 |  |
| (%) | (88.2) | (87.5) | (87.7) |  |
| 65+ | no. | 37 | 116 | 153 |  |
| (%) | (6.9) | (7.3) | (7.2) |  |
| **Female** | no. | 317 | 854 | 1171 |  |
| (%) | (59.4) | (54.0) | (55.3) | 0.031 |
| **Region** |  |  |  |  | <.001 |
| Midwest | no. | 71 | 331 | 402 |  |
| (%) | (13.3) | (20.9) | (19.0) |  |
| Northeast | no. | 137 | 276 | 413 |  |
| (%) | (25.7) | (17.4) | (19.5) |  |
| South | no. | 177 | 569 | 746 |  |
| (%) | (33.1) | (36.0) | (35.3) |  |
| West | no. | 47 | 148 | 195 |  |
| (%) | (8.8) | (9.4) | (9.2) |  |
| Unknown | no. | 102 | 258 | 360 |  |
| (%) | (19.1) | (16.3) | (17.0) |  |
| **Insurance type** |  |  |  |  | 0.767 |
| Commercial | no. | 480 | 1,429 | 1,909 |  |
| (%) | (89.9) | (90.3) | (90.2) |  |
| Medicare supplemental | no. | 54 | 153 | 207 |  |
| (%) | (10.1) | (9.7) | (9.8) |  |
| **Index year** |  |  |  |  | <.001 |
| 2015 | no. | 139 | 536 | 675 |  |
| (%) | (26.0) | (33.9) | (31.9) |  |
| 2016 | no. | 111 | 385 | 496 |  |
| (%) | (20.8) | (24.3) | (23.4) |  |
| 2017 | no. | 110 | 335 | 445 |  |
| (%) | (20.6) | (21.2) | (21.0) |  |
| 2018 | no. | 174 | 326 | 500 |  |
| (%) | (32.6) | (20.6) | (23.6) |  |
| **Prescriber specialtya** |  |  |  |  | <.001 |
| Dermatologist | no. | 47 | 50 | 97 |  |
| (%) | (8.8) | (3.2) | (4.6) |  |
| Rheumatologist | no. | 165 | 1,162 | 1,327 |  |
| (%) | (30.9) | (73.5) | (62.7) |  |
| Primary care/PA/NP | no. | 72 | 81 | 153 |  |
| (%) | (13.5) | (5.1) | (7.2) |  |
| Other/Unknown | no. | 250 | 289 | 539 |  |
| (%) | (46.8) | (18.3) | (25.5) |  |
| **Days of follow-up** | Mean | 895.2 | 919.1 | 913.1 |  |
| (SD) | (402.1) | (400.5) | (400.9) |  |
| [Median] | [788] | [847] | [833] |  |
|  |  |  |  |  | 0.022 |
| 1Y-<2Y | no. | 252 | 638 | 890 |  |
| (%) | (47.2) | (40.3) | (42.1) |  |
| 2Y-<3Y | no. | 125 | 462 | 587 |  |
| (%) | (23.4) | (29.2) | (27.7) |  |
| 3Y-<4Y | no. | 89 | 282 | 371 |  |
| (%) | (16.7) | (17.8) | (17.5) |  |
| 4Y+ | no. | 68 | 200 | 268 |  |
| (%) | (12.7) | (12.6) | (12.7) |  |

a If specialty on index fill is missing, the specialty noted on the closest medical claim with a psoriatic arthritis diagnosis within ±90 days of index date was used instead.

**Abbreviations:** SD, standard deviation; PA, physician assistant; NP, nurse practitioner.

**Supplemental Table 2: Baseline comorbidities among patients with one year of follow‑up**

|  | | **Apremilast** | **Methotrexate** | **All** | ***P* Value** |
| --- | --- | --- | --- | --- | --- |
| N | | 534 | 1,582 | 2,116 |  |
| **Charlson comorbidity index (CCI)** | Mean | 0.7 | 0.6 | 0.6 | 0.024 |
| (SD) | (1.3) | (1.1) | (1.2) |  |
| [Median] | [0] | [0] | [0] |  |
|  |  |  |  |  | 0.118 |
| 0 | no. | 333 | 1,062 | 1,395 |  |
| (%) | (62.4) | (67.1) | (65.9) |  |
| 1 | no. | 115 | 325 | 440 |  |
| (%) | (21.5) | (20.5) | (20.8) |  |
| 2 | no. | 32 | 74 | 106 |  |
| (%) | (6.0) | (4.7) | (5.0) |  |
| 3+ | no. | 54 | 121 | 175 |  |
| (%) | (10.1) | (7.6) | (8.3) |  |
| **No. of chronic conditions** | Mean | 4.6 | 4.2 | 4.3 | <.001 |
| (SD) | (2.1) | (2.1) | (2.1) |  |
| [Median] | [4] | [4] | [4] |  |
| **PsO** | no. | 384 | 940 | 1324 |  |
| (%) | (71.9) | (59.4) | (62.6) | <.001 |
| **Cardiovascular disease** | no. | 65 | 166 | 231 |  |
| (%) | (12.2) | (10.5) | (10.9) | 0.282 |
| **Diabetes** | no. | 91 | 227 | 318 |  |
| (%) | (17.0) | (14.3) | (15.0) | 0.132 |
| **Metabolic syndrome** | no. | 5 | 15 | 20 |  |
| (%) | (0.9) | (0.9) | (0.9) | 0.980 |
| **Obesity** | no. | 145 | 375 | 520 |  |
| (%) | (27.2) | (23.7) | (24.6) | 0.109 |
| **Anxiety** | no. | 81 | 228 | 309 |  |
| (%) | (15.2) | (14.4) | (14.6) | 0.669 |
| **Depression** | no. | 61 | 193 | 254 |  |
| (%) | (11.4) | (12.2) | (12.0) | 0.633 |
| **Non-alcoholic fatty liver disease** | no. | 26 | 37 | 63 |  |
| (%) | (4.9) | (2.3) | (3.0) | 0.003 |
| **Chronic kidney disease** | no. | 9 | 26 | 35 |  |
| (%) | (1.7) | (1.6) | (1.7) | 0.948 |
| **Hyperlipidemia** | no. | 194 | 584 | 778 |  |
| (%) | (36.3) | (36.9) | (36.8) | 0.808 |
| **Hypertension** | no. | 89 | 278 | 367 |  |
| (%) | (16.7) | (17.6) | (17.3) | 0.633 |
| **Periodontitis** | no. | 0 | 0 | 0 |  |
| (%) | (0.0) | (0.0) | (0.0) | n/a |
| **Serious infection** | no. | 19 | 22 | 41 |  |
| (%) | (3.6) | (1.4) | (1.9) | 0.002 |

**Abbreviations:** PsO, psoriasis.

**Supplemental Table 3: Baseline medication use among patients with one year of follow‑up**

|  | | **Apremilast** | **Methotrexate** | **All** | ***P* Value** |
| --- | --- | --- | --- | --- | --- |
| N | | 534 | 1,582 | 2,116 |  |
| **Anti-diabetic medications** | no. | 79 | 191 | 270 |  |
| (%) | (14.8) | (12.1) | (12.8) | 0.103 |
| **Lipid lowering medications** | no. | 126 | 399 | 525 |  |
| (%) | (23.6) | (25.2) | (24.8) | 0.452 |
| **Anti-hypertensive medications** | no. | 221 | 617 | 838 |  |
| (%) | (41.4) | (39.0) | (39.6) | 0.330 |
| **Pain medicationsa** | no. | 327 | 1049 | 1376 |  |
| (%) | (61.2) | (66.3) | (65.0) | 0.034 |
| **NSAIDs** | no. | 252 | 848 | 1100 |  |
| (%) | (47.2) | (53.6) | (52.0) | 0.010 |
| **Phototherapy** | no. | 0 | 0 | 0 |  |
| (%) | (0.0) | (0.0) | (0.0) | n/a |
| **Glucocorticoids** | no. | 188 | 699 | 887 |  |
| (%) | (35.2) | (44.2) | (41.9) | <.001 |
| **Anticoagulant/anti-platelet medications** | no. | 17 | 59 | 76 |  |
| (%) | (3.2) | (3.7) | (3.6) | 0.558 |

a Include opioids, NSAIDs, other analgesics, migraine products, and muscle relaxants.

**Abbreviations:** NSAIDs, nonsteroidal anti-inflammatory drugs.

**Supplemental Table 4: Baseline diagnostic tests, healthcare utilization, and costsa among patients with one year of follow‑up**

|  | | **Apremilast** | **Methotrexate** | **All** | ***P* Value** |
| --- | --- | --- | --- | --- | --- |
| N | | 534 | 1,582 | 2,116 |  |
| **Diagnostic tests (X-ray or MRI)** | no. | 342 | 1,147 | 1,489 |  |
| (%) | (64.0) | (72.5) | (70.4) | <.001 |
| X-ray | no. | 337 | 1,127 | 1,464 |  |
| (%) | (63.1) | (71.2) | (69.2) | <.001 |
| No. of X-ray | Mean | 1.06 | 1.30 | 1.24 | <.001 |
| (SD) | (1.24) | (1.32) | (1.31) |  |
| [Median] | [1] | [1] | [1] |  |
| MRI | no. | 64 | 249 | 313 |  |
| (%) | (12.0) | (15.7) | (14.8) | 0.035 |
| No. of MRI | Mean | 0.15 | 0.19 | 0.18 | 0.098 |
| (SD) | (0.44) | (0.46) | (0.46) |  |
| [Median] | [0] | [0] | [0] |  |
| **Any baseline inpatient hospitalizations** | no. | 54 | 114 | 168 |  |
| (%) | (10.1) | (7.2) | (7.9) | 0.032 |
| **No. baseline inpatient hospitalizations** |  |  |  |  | 0.189 |
| 0 | no. | 480 | 1,468 | 1,948 |  |
| (%) | (89.9) | (92.8) | (92.1) |  |
| 1 | no. | 25 | 56 | 81 |  |
|  | (%) | (4.7) | (3.5) | (3.8) |  |
| 2 | no. | 16 | 33 | 49 |  |
| (%) | (3.0) | (2.1) | (2.3) |  |
| 3+ | no. | 13 | 25 | 38 |  |
| (%) | (2.4) | (1.6) | (1.8) |  |
| **Any baseline ED visits** | no. | 87 | 273 | 360 |  |
| (%) | (16.3) | (17.3) | (17.0) | 0.608 |
| **No. of baseline office visits** | Mean | 14.5 | 11.9 | 12.6 | <.001 |
| (SD) | (14.5) | (11.5) | (12.4) |  |
| [Median] | [10] | [9] | [9] |  |
| **Baseline total healthcare costs** | Mean | $17,871 | $10,683 | $12,497 | <.001 |
|  | (SD) | (39,029.6) | (17,674.3) | (25,043.0) |  |
| [Median] | [7,197] | [5,460] | [5,933] |  |

a Adjusted to 2019 US dollars.

**Abbreviations:** MRI, magnetic resonance imaging; ED, emergency department.

**Supplemental Table 5: Number of index medication fills before biologic initiation during the 1‑year follow-up period**

|  | | **Apremilast users who initiated biologic in 1 year** | **Methotrexate users who initiated biologic in 1 year** | ***P* Value** |
| --- | --- | --- | --- | --- |
| N | | 104 | 615 |  |
| **No. of index medication fills before biologic initiation** | Mean | 3.92 | 3.68 | 0.374 |
|  | (SD) | (2.56) | (2.48) |  |
|  | [Median] | [3] | [3] |  |

**Supplemental Table 6: First biologic medication used during the 1-year follow-up period among apremilast patients who initiated biologic**

| **First biologic medication** | **Frequency** | **Percent** | **Cumulative frequency** | **Cumulative percent** |
| --- | --- | --- | --- | --- |
| Adalimumab | 43 | 41.35 | 43 | 41.35 |
| Secukinumab | 23 | 22.12 | 66 | 63.46 |
| Etanercept | 17 | 16.35 | 83 | 79.81 |
| Ustekinumab | 11 | 10.58 | 94 | 90.38 |
| Golimumab | 4 | 3.85 | 98 | 94.23 |
| Certolizumab pegol | 3 | 2.88 | 101 | 97.12 |
| Infliximab | 2 | 1.92 | 103 | 99.04 |
| Abatacept | 1 | 0.96 | 104 | 100.00 |

**Supplemental Table 7: First biologic medication used during the 1-year follow-up period among methotrexate patients who initiated biologic**

| **First biologic medication** | **Frequency** | **Percent** | **Cumulative frequency** | **Cumulative percent** |
| --- | --- | --- | --- | --- |
| Adalimumab | 374 | 60.81 | 374 | 60.81 |
| Etanercept | 154 | 25.04 | 528 | 85.85 |
| Infliximab | 22 | 3.58 | 550 | 89.43 |
| Certolizumab pegol | 20 | 3.25 | 570 | 92.68 |
| Secukinumab | 19 | 3.09 | 589 | 95.77 |
| Golimumab | 12 | 1.95 | 601 | 97.72 |
| Ustekinumab | 11 | 1.79 | 612 | 99.51 |
| Ixekizumab | 2 | 0.33 | 614 | 99.84 |
| Abatacept | 1 | 0.16 | 615 | 100.00 |

**Supplemental Table 8: Biologic initiation adjusted results**

|  | **Cox regression**  **Risk of biologic initiation in 1‑year post index** | | **Logistic regression**  **Any biologic use in 1‑year post index** | |
| --- | --- | --- | --- | --- |
| **HR (95% CI)** | ***P* Value** | **OR (95% CI)** | ***P* Value** |
| **Age groups (Ref: 65+)** |  |  |  |  |
| 18-30 | 3.21 (1.94 - 5.32) | <.001 | 4.01 (2.17 - 7.38) | <.001 |
| 31-64 | 2.52 (1.67 - 3.82) | <.001 | 2.89 (1.81 - 4.61) | <.001 |
| **Female (Ref: Male)** | 0.91 (0.78 - 1.06) | 0.212 | 0.89 (0.73 - 1.08) | 0.231 |
| **Geographic region (Ref: West)** |  |  |  |  |
| Midwest | 0.96 (0.71 - 1.29) | 0.779 | 0.96 (0.66 - 1.39) | 0.820 |
| Northeast | 0.87 (0.64 - 1.18) | 0.377 | 0.87 (0.60 - 1.27) | 0.467 |
| South | 1.15 (0.88 - 1.51) | 0.299 | 1.17 (0.83 - 1.65) | 0.377 |
| Unknown | 1.19 (0.87 - 1.62) | 0.269 | 1.22 (0.82 - 1.80) | 0.322 |
| **Index year (Ref: 2018)** |  |  |  |  |
| 2015 | 0.87 (0.71 - 1.07) | 0.181 | 0.82 (0.63 - 1.07) | 0.145 |
| 2016 | 1.03 (0.83 - 1.27) | 0.793 | 1.00 (0.76 - 1.31) | 0.975 |
| 2017 | 0.97 (0.78 - 1.21) | 0.788 | 0.97 (0.74 - 1.29) | 0.858 |
| **Prescriber specialty (Ref: Primary care/PA/NP)** |  |  |  |  |
| Dermatologist | 1.19 (0.73 - 1.95) | 0.478 | 1.18 (0.65 - 2.13) | 0.582 |
| Rheumatologist | 1.34 (0.96 - 1.87) | 0.084 | 1.36 (0.91 - 2.02) | 0.132 |
| Other/Unknown | 1.27 (0.89 - 1.81) | 0.190 | 1.23 (0.81 - 1.88) | 0.335 |
| **Baseline comorbidities of interest** |  |  |  |  |
| Charlson comorbidity index | 0.96 (0.89 - 1.04) | 0.346 | 0.96 (0.87 - 1.06) | 0.427 |
| PsO (yes vs no) | 1.13 (0.97 - 1.32) | 0.123 | 1.18 (0.97 - 1.43) | 0.102 |
| Non-alcoholic fatty liver disease (yes vs no) | 1.34 (0.87 - 2.05) | 0.183 | 1.35 (0.77 - 2.37) | 0.296 |
| Serious infection (yes vs no) | 1.11 (0.59 - 2.09) | 0.750 | 1.18 (0.52 - 2.66) | 0.694 |
| **Baseline medication use (yes vs no)** |  |  |  |  |
| Pain medication | 1.10 (0.93 - 1.29) | 0.273 | 1.08 (0.88 - 1.33) | 0.470 |
| Glucocorticoids | 1.14 (0.98 - 1.33) | 0.083 | 1.21 (1.00 - 1.47) | 0.055 |
| **Baseline HCRU and costs** |  |  |  |  |
| Any X-ray (yes vs no) | 1.33 (1.12 - 1.59) | 0.001 | 1.42 (1.14 - 1.76) | 0.002 |
| Any MRI (yes vs no) | 1.16 (0.95 - 1.42) | 0.153 | 1.22 (0.94 - 1.60) | 0.140 |
| Any inpatient hospitalization (yes vs no) | 1.30 (0.92 - 1.85) | 0.142 | 1.34 (0.85 - 2.10) | 0.205 |
| No. of baseline office visits | 1.00 (0.99 - 1.01) | 0.999 | 1.00 (0.99 - 1.01) | 0.910 |
| Total healthcare costs, per $1,000 | 0.99 (0.99 - 1.00) | 0.053 | 0.99 (0.99 - 1.00) | 0.053 |
| **Apremilast vs methotrexate** | 0.46 (0.37 - 0.57) | <.001 | 0.42 (0.32 - 0.54) | <.001 |

**Abbreviations**: HR, hazard ratio; OR, odds ratio; CI, confidence interval; Ref., reference; PA, physician assistant; NP, nurse practitioner; PsO, psoriasis; HCRU, healthcare resource utilization; MRI, magnetic resonance imaging.

**Supplemental Table 9: Baseline patient characteristics among patients with two years of follow‑up**

|  | | **Apremilast** | **Methotrexate** | **All** | ***P* Value** |
| --- | --- | --- | --- | --- | --- |
| N | | 282 | 944 | 1,226 |  |
| % | | 23.0 | 77.0 | 100 |  |
| **Age, years** | Mean | 50.4 | 50.3 | 50.4 | 0.949 |
| (SD) | (11.3) | (10.6) | (10.8) |  |
| [Median] | [51] | [51] | [51] |  |
| 5th : 95th percentile | 32 : 68 | 32 : 66 | 32 : 66 |  |
| **Female** | no. | 168 | 490 | 658 |  |
| (%) | (59.6) | (51.9) | (53.7) | 0.023 |
| **Insurance type** |  |  |  |  | 0.264 |
| Commercial | no. | 250 | 858 | 1,108 |  |
| (%) | (88.7) | (90.9) | (90.4) |  |
| Medicare supplemental | no. | 32 | 86 | 118 |  |
| (%) | (11.3) | (9.1) | (9.6) |  |
| **Prescriber specialtya** |  |  |  |  | <.001 |
| Dermatologist | no. | 27 | 33 | 60 |  |
| (%) | (9.6) | (3.5) | (4.9) |  |
| Rheumatologist | no. | 78 | 676 | 754 |  |
| (%) | (27.7) | (71.6) | (61.5) |  |
| Primary care/PA/NP | no. | 38 | 54 | 92 |  |
| (%) | (13.5) | (5.7) | (7.5) |  |
| Other/Unknown | no. | 139 | 181 | 320 |  |
| (%) | (49.3) | (19.2) | (26.1) |  |

a If specialty on index fill is missing, the specialty noted on the closest medical claim with a psoriatic arthritis diagnosis within ±90 days of index date was used instead.

**Abbreviations**: SD, standard deviation; PA, physician assistant; NP, nurse practitioner.

**Supplemental Table 10: Baseline comorbidities among patients with two years of follow-up**

|  | | **Apremilast** | **Methotrexate** | **All** | ***P* Value** |
| --- | --- | --- | --- | --- | --- |
| N | | 282 | 944 | 1,226 |  |
| **Charlson comorbidity index** | Mean | 0.7 | 0.6 | 0.6 | 0.143 |
| (SD) | (1.2) | (1.2) | (1.2) |  |
| [Median] | [0] | [0] | [0] |  |
|  |  |  |  |  | 0.214 |
| 0 | no. | 171 | 634 | 805 |  |
| (%) | (60.6) | (67.2) | (65.7) |  |
| 1 | no. | 68 | 193 | 261 |  |
| (%) | (24.1) | (20.4) | (21.3) |  |
| 2 | no. | 16 | 38 | 54 |  |
| (%) | (5.7) | (4.0) | (4.4) |  |
| 3+ | no. | 27 | 79 | 106 |  |
| (%) | (9.6) | (8.4) | (8.6) |  |
| **No. of chronic conditions** | Mean | 4.6 | 4.1 | 4.2 | <.001 |
| (SD) | (2.1) | (2.1) | (2.1) |  |
| [Median] | [4] | [4] | [4] |  |
| **PsO** | no. | 204 | 560 | 764 |  |
| (%) | (72.3) | (59.3) | (62.3) | <.001 |
| **Cardiovascular disease** | no. | 35 | 95 | 130 |  |
| (%) | (12.4) | (10.1) | (10.6) | 0.261 |
| **Diabetes** | no. | 43 | 137 | 180 |  |
| (%) | (15.2) | (14.5) | (14.7) | 0.759 |
| **Metabolic syndrome** | no. | 2 | 8 | 10 |  |
| (%) | (0.7) | (0.8) | (0.8) | 0.821 |
| **Obesity** | no. | 74 | 201 | 275 |  |
| (%) | (26.2) | (21.3) | (22.4) | 0.080 |
| **Anxiety** | no. | 46 | 144 | 190 |  |
| (%) | (16.3) | (15.3) | (15.5) | 0.667 |
| **Depression** | no. | 30 | 113 | 143 |  |
| (%) | (10.6) | (12.0) | (11.7) | 0.541 |
| **Non-alcoholic fatty liver disease** | no. | 14 | 16 | 30 |  |
| (%) | (5.0) | (1.7) | (2.4) | 0.002 |
| **Chronic kidney disease** | no. | 2 | 15 | 17 |  |
| (%) | (0.7) | (1.6) | (1.4) | 0.268 |
| **Hyperlipidemia** | no. | 96 | 365 | 461 |  |
| (%) | (34.0) | (38.7) | (37.6) | 0.160 |
| **Hypertension** | no. | 60 | 198 | 258 |  |
| (%) | (21.3) | (21.0) | (21.0) | 0.913 |
| **Periodontitis** | no. | 0 | 0 | 0 |  |
| (%) | (0.0) | (0.0) | (0.0) | n/a |
| **Serious infection** | no. | 10 | 15 | 25 |  |
| (%) | (3.5) | (1.6) | (2.0) | 0.041 |

**Supplemental Table 11: Baseline other medication use among patients with two years of follow-up**

|  | | **Apremilast** | **Methotrexate** | **All** | ***P* Value** |
| --- | --- | --- | --- | --- | --- |
| N | | 282 | 944 | 1,226 |  |
| **Anti-diabetics** | no. | 38 | 113 | 151 |  |
| (%) | (13.5) | (12.0) | (12.3) | 0.500 |
| **Lipid lowering medications** | no. | 63 | 247 | 310 |  |
| (%) | (22.3) | (26.2) | (25.3) | 0.195 |
| **Anti-hypertensives** | no. | 111 | 362 | 473 |  |
| (%) | (39.4) | (38.3) | (38.6) | 0.759 |
| **Pain medicationsa** | no. | 182 | 627 | 809 |  |
| (%) | (64.5) | (66.4) | (66.0) | 0.559 |
| **NSAIDs** | no. | 133 | 493 | 626 |  |
| (%) | (47.2) | (52.2) | (51.1) | 0.136 |
| **Phototherapy** | no. | 0 | 0 | 0 |  |
| (%) | (0.0) | (0.0) | (0.0) | n/a |
| **Glucocorticoids** | no. | 108 | 414 | 522 |  |
| (%) | (38.3) | (43.9) | (42.6) | 0.098 |
| **Anticoagulant/anti-platelet medications** | no. | 7 | 32 | 39 |  |
| (%) | (2.5) | (3.4) | (3.2) | 0.446 |

a Include opioids, NSAIDs, other analgesics, migraine products, and muscle relaxants.

**Abbreviations:** NSAIDs, nonsteroidal anti-inflammatory drugs.

**Supplemental Table 12: Baseline diagnostic tests, healthcare utilization, and costs among patients with 2 years of follow-up**

|  | | **Apremilast** | **Methotrexate** | **All** | ***P* Value** |
| --- | --- | --- | --- | --- | --- |
| N | | 282 | 944 | 1,226 |  |
| **Diagnostic tests (X-ray or MRI)** | no. | 178 | 665 | 843 |  |
| (%) | (63.1) | (70.4) | (68.8) | 0.020 |
| **X-ray** | no. | 175 | 652 | 827 |  |
| (%) | (62.1) | (69.1) | (67.5) | 0.027 |
| **No. of X-ray** | Mean | 1.02 | 1.25 | 1.20 | 0.004 |
| (SD) | (1.14) | (1.29) | (1.26) |  |
| [Median] | [1] | [1] | [1] |  |
| **MRI** | no. | 30 | 154 | 184 |  |
| (%) | (10.6) | (16.3) | (15.0) | 0.019 |
| **No. of MRI** | Mean | 0.13 | 0.20 | 0.18 | 0.043 |
| (SD) | (0.43) | (0.48) | (0.47) |  |
| [Median] | [0] | [0] | [0] |  |
| **Any baseline inpatient hospitalizations** | no. | 33 | 68 | 101 |  |
| (%) | (11.7) | (7.2) | (8.2) | 0.016 |
| **No. of baseline inpatient hospitalizations** |  |  |  |  | 0.102 |
| 0 | no. | 249 | 876 | 1,125 |  |
| (%) | (88.3) | (92.8) | (91.8) |  |
| 1 | no. | 16 | 29 | 45 |  |
| (%) | (5.7) | (3.1) | (3.7) |  |
| 2 | no. | 11 | 25 | 36 |  |
| (%) | (3.9) | (2.6) | (2.9) |  |
| 3+ | no. | 6 | 14 | 20 |  |
| (%) | (2.1) | (1.5) | (1.6) |  |
| **Any baseline ED visits** | no. | 47 | 164 | 211 |  |
| (%) | (16.7) | (17.4) | (17.2) | 0.783 |
| **No. of baseline office visits** | Mean | 14.7 | 12.2 | 12.8 | 0.006 |
| (SD) | (13.6) | (11.7) | (12.2) |  |
| [Median] | [11] | [9] | [10] |  |
| **Baseline total healthcare costs** | Mean | $18,925 | $10,752 | $12,632 | 0.003 |
| (SD) | (45,357.0) | (16,143.8) | (26,160.6) |  |
| [Median] | [8,104] | [5,700] | [6,286] |  |

a Adjusted to 2019 US dollars.

**Abbreviations:** MRI, magnetic resonance imaging; ED, emergency department.

**Supplemental Table 13: Biologic initiation among patients with two years of follow-up**

|  | | **Apremilast** | **Methotrexate** | **All** | ***P* Value** |
| --- | --- | --- | --- | --- | --- |
| N | | 282 | 944 | 1,226 |  |
| **Biologic initiation rate during the 2-year follow-up period** | no. | 88 | 468 | 556 |  |
| (%) | (31.2) | (49.6) | (45.4) | <.001 |
| Days to biologic initiation among patients who initiated biologic in two years | Mean | 297.3 | 212.1 | 225.6 | <.001 |
| (SD) | (172.8) | (183.0) | (183.9) |  |
| [Median] | [261] | [145] | [164] |  |
| **Biologic initiation rate within three months** | no. | 9 | 141 | 150 |  |
| (%) | (3.2) | (14.9) | (12.2) | <.001 |
| **Biologic initiation rate within six months** | no. | 25 | 268 | 293 |  |
| (%) | (8.9) | (28.4) | (23.9) | <.001 |

**Abbreviations:** SD, standard deviation.

**Supplemental Table 14: Biologic initiation adjusted results among patients with 2 years of follow-up**

|  | **Cox regression**  **Risk of biologic initiation in 2-year post index** | | **Logistic regression**  **Any biologic use in 2-year post index** | |
| --- | --- | --- | --- | --- |
| **HR (95% CI)** | ***P* Value** | **OR (95% CI)** | ***P* Value** |
| **Age groups (Ref: 65+)** |  |  |  |  |
| 18-30 | 3.04 (1.65 - 5.60) | <.001 | 4.14 (1.86 - 9.22) | <.001 |
| 31-64 | 2.47 (1.54 - 3.98) | <.001 | 3.25 (1.84 - 5.73) | <.001 |
| **Female (Ref: Male)** | 0.89 (0.75 - 1.05) | 0.166 | 0.86 (0.68 - 1.09) | 0.210 |
| **Geographic region (Ref. West)** |  |  |  |  |
| Midwest | 1.06 (0.74 - 1.50) | 0.763 | 1.06 (0.65 - 1.71) | 0.823 |
| Northeast | 1.02 (0.72 - 1.44) | 0.908 | 1.08 (0.67 - 1.72) | 0.759 |
| South | 1.14 (0.83 - 1.57) | 0.432 | 1.13 (0.73 - 1.76) | 0.583 |
| Unknown | 1.32 (0.94 - 1.87) | 0.112 | 1.39 (0.86 - 2.25) | 0.176 |
| **Index year (Ref: 2017)** |  |  |  |  |
| 2015 | 0.89 (0.72 - 1.10) | 0.284 | 0.83 (0.62 - 1.11) | 0.215 |
| 2016 | 1.05 (0.85 - 1.30) | 0.657 | 1.04 (0.76 - 1.40) | 0.820 |
| **Prescriber specialty (Ref: Primary care/PA/NP)** |  |  |  |  |
| Dermatologist | 0.90 (0.53 - 1.52) | 0.698 | 0.79 (0.40 - 1.58) | 0.511 |
| Rheumatologist | 1.06 (0.76 - 1.49) | 0.716 | 0.99 (0.62 - 1.56) | 0.953 |
| Other/Unknown | 1.00 (0.70 - 1.43) | 0.990 | 0.89 (0.55 - 1.46) | 0.655 |
| **Baseline comorbidities of interest** |  |  |  |  |
| Charlson comorbidity index | 1.01 (0.93 - 1.09) | 0.898 | 1.03 (0.92 - 1.16) | 0.568 |
| PsO (yes vs no) | 1.19 (1.00 - 1.42) | 0.056 | 1.32 (1.03 - 1.68) | 0.028 |
| Non-alcoholic fatty liver disease (yes vs no) | 1.66 (0.99 - 2.80) | 0.056 | 1.94 (0.87 - 4.32) | 0.106 |
| Serious infection (yes vs no) | 0.84 (0.39 - 1.77) | 0.640 | 0.79 (0.29 - 2.15) | 0.645 |
| **Baseline medication use (yes vs no)** |  |  |  |  |
| Pain medication | 1.13 (0.94 - 1.36) | 0.201 | 1.15 (0.89 - 1.48) | 0.298 |
| Glucocorticoids | 1.11 (0.93 - 1.32) | 0.250 | 1.17 (0.92 - 1.50) | 0.195 |
| **Baseline HCRU and Costs** |  |  |  |  |
| Any X-ray (yes vs no) | 1.02 (0.84 - 1.23) | 0.867 | 0.97 (0.75 - 1.26) | 0.812 |
| Any MRI (yes vs no) | 1.33 (1.06 - 1.68) | 0.015 | 1.50 (1.06 - 2.11) | 0.021 |
| Any inpatient hospitalization (yes vs no) | 1.14 (0.76 - 1.70) | 0.520 | 1.17 (0.68 - 2.02) | 0.563 |
| No. of baseline office visits | 1.00 (0.99 - 1.00) | 0.386 | 1.00 (0.99 - 1.01) | 0.448 |
| Total healthcare costs, per $1,000 | 1.00 (0.99 - 1.00) | 0.317 | 1.00 (0.99 - 1.00) | 0.306 |
| **Apremilast vs methotrexate** | 0.53 (0.41 - 0.67) | <.001 | 0.46 (0.34 - 0.64) | <.001 |

**Abbreviations:** HR, hazard ratio; OR, odds ratio; CI, confidence interval; Ref., reference; PA, physician assistant; NP, nurse practitioner; PsO, psoriasis; HCRU, healthcare resource utilization; MRI, magnetic resonance imaging.

**Supplemental Figure 1: Time to biologic initiation during the 2-year follow-up period among patients with two years of follow-up**
